# Supplementary material for: Cyclic Soft/Hardening and Microscopic Mechanism of GS-20Mn5
Source: Research Square preprint supplement (doi:10.21203/rs.3.rs-654341/v1), 2021-07-08
Supplement: Supplementary file 3 [file e055d551ebe9792b1bca85b8.xlsx]

## Sheet: Sheet1
Tab. 1 Chemical composition of GS20Mn5 cast steel (mass fraction wt%)
C	Si	Mn	P	S	Cr	Mo	Ni	Fe
0.134	1.62	1.2	0.01	0.032	0.094	0.06	0.14	96.71
