# Supplementary material for: Cyclic Soft/Hardening and Microscopic Mechanism of GS-20Mn5
Source: Research Square preprint supplement (doi:10.21203/rs.3.rs-654341/v1), 2021-07-08
Supplement: Supplementary file 4 [file 4f8200e96cb5de0dcca7a231.xlsx]

## Sheet: Sheet1
Tab.3 Cycles setting of quasi-in-situ cyclic loading test under strain amplitude of 0.2%
Strain amplitude /%	0.2
Number of cycles /cycle	10	60	3000
