# Supplementary material for: Cyclic Soft/Hardening and Microscopic Mechanism of GS-20Mn5
Source: Research Square preprint supplement (doi:10.21203/rs.3.rs-654341/v1), 2021-07-08
Supplement: Supplementary file 5 [file 8b919cf86263298df7aa03b5.xlsx]

## Sheet: Sheet1
Tab. 2 strain amplitudes and number of cycles in cyclic loading test
Strain amplitude /%	0.16	0.2	0.3	0.4	0.5
Number of cycles /cycle	3000	3000	3000	2454	1811
